# Supplementary material
Source: publisher figshare collection journal article supplement (https://geolsoc.figshare.com/ndownloader/files/5422664)
Supplement: Supplementary file 1 [file 5422664]

Supplementary Data Table 2: Mineral chemical data
		Wt.% Oxide:													Atoms:													End Members:
Sample	Analysis	SiO2	TiO2	Al2O3	FeO	MnO	MgO	CaO	BaO	Na2O	K2O	Ce2O3	P2O5		Si	Ti	Al	Cr	Fe3	Fe2	Mn	Mg	Ca	Ba	Na	K	Total Oxy	An	Ab	Or
SPH215	PB-153	64.79	0.00	18.74	0.20	0.01	0.02	0.00	0.46	0.46	16.57	0.17	0.00		2.96	0.00	1.01	0.00	0.00	0.01	0.00	0.00	0.00	0.01	0.04	0.97	7.97	0.00	4.05	95.95
SPH215	PB-154	64.30	0.01	18.58	0.06	0.01	0.00	0.00	0.61	0.38	16.63	0.21	0.00		2.96	0.00	1.01	0.00	0.00	0.00	0.00	0.00	0.00	0.01	0.03	0.98	7.96	0.00	3.36	96.64
SPH215	PB-155	64.45	0.00	19.18	0.06	0.00	0.00	0.25	0.71	1.76	13.73	0.25	0.00		2.97	0.00	1.04	0.00	0.00	0.00	0.00	0.00	0.01	0.01	0.16	0.81	8.01	1.26	16.10	82.64
SPH215	PB-156	63.76	0.02	19.09	0.07	0.00	0.00	0.00	1.42	0.57	16.04	0.53	0.00		2.94	0.00	1.04	0.00	0.00	0.00	0.00	0.00	0.00	0.03	0.05	0.94	7.96	0.00	5.12	94.88
SPH215	PB-157	64.27	0.00	18.76	0.06	0.01	0.01	0.02	0.65	0.61	16.33	0.21	0.00		2.96	0.00	1.02	0.00	0.00	0.00	0.00	0.00	0.00	0.01	0.05	0.96	7.96	0.10	5.37	94.54
SPH215	PB-158	64.50	0.00	18.70	0.03	0.00	0.00	0.00	0.68	0.64	16.36	0.26	0.00		2.96	0.00	1.01	0.00	0.00	0.00	0.00	0.00	0.00	0.01	0.06	0.96	7.96	0.00	5.61	94.39
SPH215	PB-159	62.99	0.03	19.98	0.43	0.01	0.37	0.00	0.58	0.35	15.74	0.22	0.00		2.90	0.00	1.09	0.00	0.00	0.02	0.00	0.03	0.00	0.01	0.03	0.93	7.97	0.00	3.27	96.73
SPH215	PB-160	64.06	0.01	18.47	0.05	0.00	0.00	0.00	0.49	0.40	16.59	0.18	0.01		2.97	0.00	1.01	0.00	0.00	0.00	0.00	0.00	0.00	0.01	0.04	0.98	7.96	0.00	3.53	96.47
SPH215	PB-161	64.81	0.00	18.92	0.05	0.01	0.00	0.00	0.71	0.78	16.05	0.23	0.03		2.96	0.00	1.02	0.00	0.00	0.00	0.00	0.00	0.00	0.01	0.07	0.94	7.97	0.00	6.88	93.12
SPH215	PB-162	64.15	0.02	19.07	0.03	0.00	0.01	0.00	1.25	0.65	15.80	0.47	0.00		2.95	0.00	1.03	0.00	0.00	0.00	0.00	0.00	0.00	0.02	0.06	0.93	7.98	0.00	5.88	94.12
SPH215	PB-163	64.66	0.00	18.63	0.06	0.00	0.00	0.00	0.50	0.43	16.44	0.20	0.00		2.98	0.00	1.01	0.00	0.00	0.00	0.00	0.00	0.00	0.01	0.04	0.96	7.98	0.00	3.82	96.18
SPH215	PB-164	64.74	0.00	18.69	0.16	0.00	0.00	0.00	0.55	0.43	16.64	0.19	0.00		2.96	0.00	1.01	0.00	0.00	0.01	0.00	0.00	0.00	0.01	0.04	0.97	7.96	0.00	3.78	96.22
SPH215	PB-165	64.55	0.00	18.76	0.04	0.00	0.01	0.00	0.80	0.37	16.43	0.27	0.01		2.97	0.00	1.02	0.00	0.00	0.00	0.00	0.00	0.00	0.01	0.03	0.96	7.98	0.00	3.31	96.69
SPH215	PB-166	64.82	0.00	18.82	0.04	0.00	0.00	0.00	0.55	0.64	16.36	0.18	0.01		2.96	0.00	1.01	0.00	0.00	0.00	0.00	0.00	0.00	0.01	0.06	0.95	7.97	0.00	5.61	94.39
SPH215	PB-167	63.86	0.01	18.88	0.07	0.00	0.00	0.01	1.23	0.58	16.08	0.44	0.01		2.95	0.00	1.03	0.00	0.00	0.00	0.00	0.00	0.00	0.02	0.05	0.95	7.96	0.05	5.19	94.76
SPH215	PB-168	65.10	0.00	18.88	0.06	0.00	0.01	0.00	0.62	0.41	16.30	0.20	0.01		2.98	0.00	1.02	0.00	0.00	0.00	0.00	0.00	0.00	0.01	0.04	0.95	7.99	0.00	3.68	96.32
SPH215	PB-169	63.28	0.02	18.44	0.07	0.00	0.01	0.00	0.47	0.46	16.44	0.19	0.00		2.95	0.00	1.01	0.00	0.00	0.00	0.00	0.00	0.00	0.01	0.04	0.98	7.95	0.00	4.08	95.92
SPH215	PB-170	64.79	0.01	18.75	0.04	0.01	0.00	0.00	0.51	0.48	16.48	0.17	0.02		2.97	0.00	1.01	0.00	0.00	0.00	0.00	0.00	0.00	0.01	0.04	0.96	7.97	0.00	4.24	95.76
SPH215	PB-242	54.71	0.00	29.05	0.14	0.00	0.00	10.85	0.00	5.61	0.12	0.00	0.03		2.45	0.00	1.53	0.00	0.00	0.01	0.00	0.00	0.52	0.00	0.49	0.01	7.97	51.31	48.01	0.68
SPH215	PB-243	58.18	0.00	27.08	0.17	0.00	0.00	8.53	0.00	7.13	0.17	0.00	0.04		2.56	0.00	1.41	0.00	0.00	0.01	0.00	0.00	0.40	0.00	0.61	0.01	7.96	39.43	59.64	0.94
SPH215	PB-244	55.73	0.01	28.50	0.16	0.00	0.00	10.24	0.02	5.87	0.21	0.00	0.01		2.49	0.00	1.50	0.00	0.00	0.01	0.00	0.00	0.49	0.00	0.51	0.01	7.98	48.50	50.31	1.18
SPH215	PB-245	57.43	0.00	26.69	0.14	0.00	0.01	8.44	0.01	6.99	0.19	0.00	0.02		2.57	0.00	1.41	0.00	0.00	0.01	0.00	0.00	0.40	0.00	0.61	0.01	7.96	39.60	59.34	1.06
SPH215	PB-246	57.60	0.00	26.89	0.16	0.01	0.00	8.75	0.00	6.67	0.30	0.02	0.01		2.57	0.00	1.41	0.00	0.00	0.01	0.00	0.00	0.42	0.00	0.58	0.02	7.98	41.32	57.00	1.69
SPH215	PB-247	58.26	0.00	26.95	0.11	0.00	0.00	8.46	0.00	6.97	0.15	0.00	0.00		2.58	0.00	1.41	0.00	0.00	0.00	0.00	0.00	0.40	0.00	0.60	0.01	7.98	39.81	59.35	0.84
